# Supplementary material
Source: ML conference proceedings conference paper supplement (https://proceedings.neurips.cc/paper_files/paper/2022/hash/e7a217c3389b323fe156046ed3aa1e0e-Abstract.html)
Supplement: Supplementary file 1 [file e7a217c3389b323fe156046ed3aa1e0e-Supplemental-Conference.pdf]

---

# Supplement: Robustness to Label Noise Depends on the Shape of the Noise Distribution

---

**Diane Oyen**

Los Alamos National Lab  
doyen@lanl.gov

**Michal Kucer**

Los Alamos National Lab

**Nick Hengartner**

Los Alamos National Lab

**Har Simrat Singh**

Los Alamos National Lab

## Checklist

1. For all authors...
  - (a) Do the main claims made in the abstract and introduction accurately reflect the paper's contributions and scope? [\[Yes\]](#)
  - (b) Did you describe the limitations of your work? [\[Yes\]](#) In Section 6.
  - (c) Did you discuss any potential negative societal impacts of your work? [\[N/A\]](#)
  - (d) Have you read the ethics review guidelines and ensured that your paper conforms to them? [\[Yes\]](#)
2. If you are including theoretical results...
  - (a) Did you state the full set of assumptions of all theoretical results? [\[Yes\]](#)
  - (b) Did you include complete proofs of all theoretical results? [\[Yes\]](#) In Supplement
3. If you ran experiments...
  - (a) Did you include the code, data, and instructions needed to reproduce the main experimental results (either in the supplemental material or as a URL)? [\[Yes\]](#) Instructions are provided. We will provide code after internal review for release.
  - (b) Did you specify all the training details (e.g., data splits, hyperparameters, how they were chosen)? [\[Yes\]](#)
  - (c) Did you report error bars (e.g., with respect to the random seed after running experiments multiple times)? [\[Yes\]](#) See Section 4. For the computationally-expensive benchmark results in Section 5, the typical cross-validation error bars would take days to produce; yet the observed trends between noise settings which support our claims are significantly larger than the variation among models.
  - (d) Did you include the total amount of compute and the type of resources used (e.g., type of GPUs, internal cluster, or cloud provider)? [\[Yes\]](#) In Supplement
4. If you are using existing assets (e.g., code, data, models) or curating/releasing new assets...
  - (a) If your work uses existing assets, did you cite the creators? [\[Yes\]](#)
  - (b) Did you mention the license of the assets? [\[Yes\]](#) In Supplement
  - (c) Did you include any new assets either in the supplemental material or as a URL? [\[N/A\]](#)
  - (d) Did you discuss whether and how consent was obtained from people whose data you're using/curating? [\[N/A\]](#)
  - (e) Did you discuss whether the data you are using/curating contains personally identifiable information or offensive content? [\[Yes\]](#) While the CIFAR-10/100 datasets are subsets

of the TinyImages dataset, the CIFAR-10/100 datasets do not contain the offensive categories of TinyImages. CIFAR-10/100 are widely-used benchmark datasets, and we are not aware of any specific ethical issues.

5. If you used crowdsourcing or conducted research with human subjects...

- (a) Did you include the full text of instructions given to participants and screenshots, if applicable? [N/A]
- (b) Did you describe any potential participant risks, with links to Institutional Review Board (IRB) approvals, if applicable? [N/A]
- (c) Did you include the estimated hourly wage paid to participants and the total amount spent on participant compensation? [N/A]

## A Theory: Proofs

Proofs provided for theoretical results of Section 3.

### A.1 Uniform noise

*Proof.* Lemma 3.2:

Let  $c, \epsilon, m_k^*(x)$ , and  $m_k(x)$  by defined as in Eq 2, Eq 3, and Definition 3.1. So,

$$\begin{aligned}
& \mathbb{E}[I([\arg \max_i m_i(x)] = k) | Y = k] = \\
&= \sum_{i=1}^c m_i(x) P[Y^* = i | Y = k] \\
&= m_k(x) P[Y^* = k | Y = k] + \sum_{i \neq k} m_i(x) P[Y^* = i | Y = k] \\
&= m_k(x)(1 - \epsilon) + \frac{\epsilon}{c-1} \sum_{i \neq k} m_i(x) \quad (\text{Definition 3.1 Uniform noise}) \\
&= m_k(x)(1 - \epsilon) + \frac{\epsilon}{c-1} (1 - m_k(x)) \quad (\sum_{i=1}^c m_i(x) = 1) \\
&= \frac{\epsilon}{c-1} + m_k(x) \left(1 - \frac{c\epsilon}{c-1}\right) \\
&= \frac{\epsilon}{c-1} + \left(m_k^*(x) - \frac{c\epsilon}{c-1} m_k^*(x) + \frac{\epsilon}{c-1}\right) \left(1 - \frac{c\epsilon}{c-1}\right) \quad (\text{Substitute } m_k(x) \text{ with Eq 3}) \\
&= \frac{\epsilon}{c-1} + m_k^*(x) - \frac{c\epsilon}{c-1} m_k^*(x) + \frac{\epsilon}{c-1} - \frac{c\epsilon}{c-1} m_k^*(x) + \frac{c^2\epsilon^2}{(c-1)^2} m_k^*(x) - \frac{c\epsilon^2}{(c-1)^2} \\
&= m_k^*(x) \left(1 - \frac{2c\epsilon}{c-1} + \frac{c^2\epsilon^2}{(c-1)^2}\right) + \frac{2\epsilon}{c-1} - \frac{\epsilon^2 + c\epsilon^2 - \epsilon^2}{(c-1)^2} \\
&= m_k^*(x) \left(1 - \frac{c\epsilon}{c-1}\right)^2 + \frac{\epsilon}{c-1} \left(2 - \frac{c\epsilon}{c-1}\right) \quad \square
\end{aligned}$$

*Proof.* Corollary 3.2.1:  
Minimize Eq 6 with respect to  $\epsilon$ :

$$\begin{aligned}
0 &= \frac{d}{d\epsilon} \left[ \bar{m}_k^* \left( 1 - \frac{c\epsilon}{c-1} \right)^2 + \frac{\epsilon}{c-1} \left( 2 - \frac{c\epsilon}{c-1} \right) \right] \\
0 &= \frac{d}{d\epsilon} \left[ \bar{m}_k^* - \frac{2c\epsilon}{c-1} \bar{m}_k^* + \frac{c^2\epsilon^2}{(c-1)^2} \bar{m}_k^* + \frac{2\epsilon}{c-1} - \frac{c\epsilon^2}{(c-1)^2} \right] \\
0 &= -\frac{2c}{c-1} \bar{m}_k^* + \frac{2c^2\epsilon}{(c-1)^2} \bar{m}_k^* + \frac{2}{c-1} - \frac{2c\epsilon}{(c-1)^2} \\
0 &= -c^2 \bar{m}_k^* + c \bar{m}_k^* + c^2 \epsilon \bar{m}_k^* + c - 1 - c\epsilon \quad (\text{Multiply by } \frac{(c-1)^2}{2}) \\
c\epsilon(1 - c\bar{m}_k^*) &= (1 - c\bar{m}_k^*)(c-1) \\
\epsilon &= \frac{(1 - c\bar{m}_k^*)(c-1)}{c(1 - c\bar{m}_k^*)} \\
\epsilon &= \frac{(c-1)}{c} \quad (\text{for } \bar{m}_k^* \neq \frac{1}{c})
\end{aligned}$$

The 2nd-derivative is strictly positive as long as  $\bar{m}_k^* > \frac{1}{c}$ . Assert:

$$\begin{aligned}
\frac{d}{d\epsilon} \left[ -\frac{2c}{c-1} \bar{m}_k^* + \frac{2c^2\epsilon}{(c-1)^2} \bar{m}_k^* + \frac{2}{c-1} - \frac{2c\epsilon}{(c-1)^2} \right] &> 0 \\
\frac{2c^2}{(c-1)^2} \bar{m}_k^* - \frac{2c}{(c-1)^2} &> 0 \\
\frac{2c^2}{(c-1)^2} \bar{m}_k^* &> \frac{2c}{(c-1)^2} \\
\bar{m}_k^* &> \frac{1}{c}
\end{aligned}$$

therefore setting  $\epsilon = \frac{c-1}{c}$  gives the global minimum when  $\bar{m}_k^* > \frac{1}{c}$ .  $\square$

Note that the condition that  $\bar{m}_k^* > \frac{1}{c}$  is not necessary for the proof, but it makes the results sensible while simplifying the proof. In the case that  $\bar{m}_k^* = \frac{1}{c}$ , i.e. classification is no better or worse than random chance; Eq 6 is constant and so  $\epsilon = \frac{c-1}{c}$  trivially minimizes Eq 6. In the case that  $\bar{m}_k^* < \frac{1}{c}$ , i.e. classification is worse than random chance; then we get a vacuous result in which label noise actually improves classification and  $\epsilon = \frac{c-1}{c}$  maximizes Eq 6.

*Proof.* Theorem 3.3:

$$\begin{aligned}
\mathbb{E}[I([\arg \max_i m_i(x)] = k) | Y^* = k] &= P[Y^* = k | X = x] \cdot I([\arg \max_i m_i(x)] = k) \\
&\approx m_k^*(x) \frac{b^{m_k(x)}}{\sum_{i=1}^c b^{m_i(x)}} \\
&= m_k^*(x) \frac{b^{m_k(x)}}{b^{m_k(x)} + \sum_{i \neq k} b^{m_i(x)}} \\
&= \frac{m_k^*(x)}{1 + \sum_{i \neq k} b^{(m_i(x) - m_k(x))}}
\end{aligned}$$

Let  $u = m_i(x) - m_k(x)$ . So,

$$\begin{aligned}
u &= m_i(x) - m_k(x) \\
&= m_i^*(x) - \frac{c\epsilon}{c-1}m_i^*(x) + \frac{\epsilon}{c-1} - m_k^*(x) + \frac{c\epsilon}{c-1}m_k^*(x) - \frac{\epsilon}{c-1} \quad (\text{Equation 5}) \\
&= m_i^*(x) - m_k^*(x) + \frac{c\epsilon}{c-1}(m_k^*(x) - m_i^*(x)) \\
&= (m_k^*(x) - m_i^*(x)) \left( \frac{c\epsilon}{c-1} - 1 \right) \\
&\leq (2m_k^*(x) - 1) \left( \frac{c\epsilon}{c-1} - 1 \right) \quad (m_i^*(x) \leq 1 - m_k^*(x)) \\
&= \frac{c}{c-1}(2m_k^*(x) - 1) \left( \epsilon - \frac{c-1}{c} \right)
\end{aligned}$$

Plug  $u$  back in:

$$\begin{aligned}
\mathbb{E}[I([\arg \max_i m_i(x)] = k) | Y^* = k] &\approx \frac{m_k^*(x)}{1 + \sum_{i \neq k} b^u} \\
&\approx \frac{m_k^*(x)}{1 + b^{\frac{c}{c-1}(2m_k^*(x)-1)(\epsilon - \frac{c-1}{c})}} \quad ,
\end{aligned}$$

□

## A.2 Class-dependent noise

Lemma 3.5 follows from Definition 3.4 and the noisy posterior likelihood given in Eq 9.

*Proof.* Lemma 3.5: Let  $c$ ,  $\epsilon$ ,  $m_k^*(x)$ , and  $m_k(x)$  by defined as in Eq 2, Eq 3, and Definition 3.4. So,

$$\begin{aligned}
&\mathbb{E}[I([\arg \max_i m_i(x)] = k) | Y = k] = \\
&= \sum_{i=1}^c m_i(x) P[Y^* = i | Y = k] \\
&= m_k(x) P[Y^* = k | Y = k] + \sum_{i \neq k} m_i(x) P[Y^* = i | Y = k] \\
&\approx m_k(x)(1 - \epsilon) + \frac{\epsilon}{s} \sum_{i \neq k; t_{ki} > 0} m_i(x) \quad (\text{Definition 3.4}) \\
&\leq m_k(x)(1 - \epsilon) + \frac{\epsilon}{s}(1 - m_k(x)) \quad (\sum_{i \neq k; t_{ki} > 0} m_i(x) \leq 1 - m_k(x)) \\
&= \frac{\epsilon}{s} + m_k(x) \left( 1 - \frac{(s+1)\epsilon}{s} \right) \\
&= \frac{\epsilon}{s} + \left( m_k^*(x) - \frac{(s+1)\epsilon}{s}m_k^*(x) + \frac{\epsilon}{s} \right) \left( 1 - \frac{(s+1)\epsilon}{s} \right) \quad (\text{Substitute } m_k(x) \text{ with Eq 9}) \\
&= m_k^*(x) \left( 1 - \frac{(s+1)\epsilon}{s} \right)^2 + \frac{\epsilon}{s} \left( 2 - \frac{(s+1)\epsilon}{s} \right) \quad \square
\end{aligned}$$

The proof of Theorem 3.6 is identical to that of Theorem 3.3 except using the value of  $m_k(x)$  given in Eq 9 instead of the value given in Eq 5; or equivalently by simply replacing  $c$  in Theorem 3.3 with  $s + 1$  to yield Theorem 3.6.

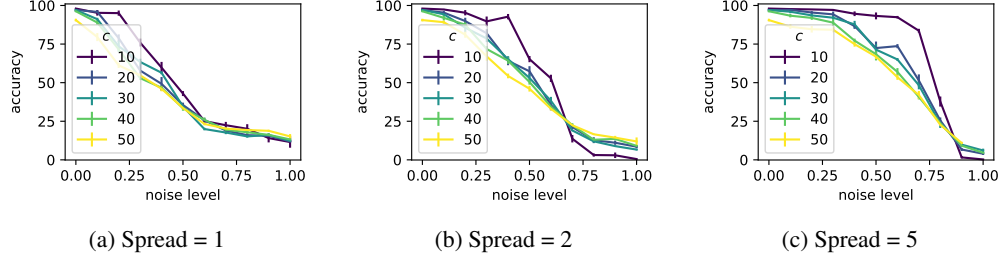

Figure S1: Deep learning results on synthetic 5D data with class-dependent noise.

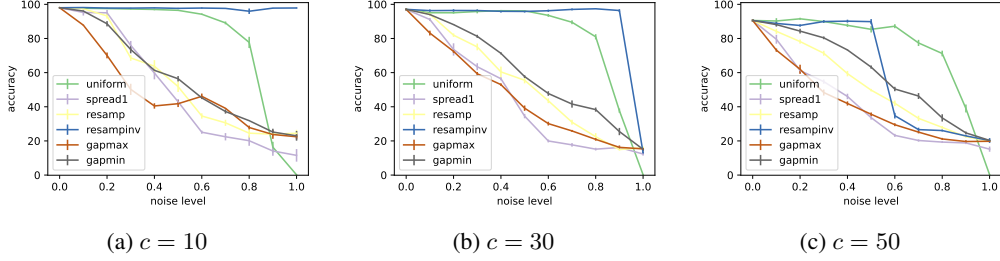

Figure S2: Deep learning results on synthetic 5D data with feature-dependent noise.

## B Further Synthetic Data Experiments

### B.1 Learning details

All of our code and experiments are implemented in Python using the PyTorch [5] deep learning framework. Synthetic data experiments are performed on an internal cluster where each server node is equipped with 4 NVIDIA 1080Ti GPUs, paired with a 24-core Intel Broadwell E5-2650 v4 CPU and 125GB of memory. All of these experiments use a simple neural network architecture with 2 fully-connected hidden layers of width 10 each, with tanh activation functions and softmax final layer. We use cross-entropy loss with the Adam optimizer with learning rate 0.001 [2]. Various settings for the architecture, loss function, and optimizer were evaluated on clean data (no label noise) to determine the best

For each noise setting, it takes about 70 seconds on a single GPU to learn 5 randomly-initialized models. Therefore, the total computation time for the synthetic data experiments is about 24 compute hours (8 noise types times 10 noise levels times 16 datasets times 70 seconds). The mitigation strategies take longer because they require a 5-fold cross validation (for CleanLab) or training dual networks (for CoTeaching). Therefore, we only evaluate these on a subset of noise types (5 noise types), and numbers of classes/dimensions (2 datasets) for a compute time of about 21 hours for CleanLab and 11 hours for CoTeaching.

### B.2 Results on 5d Data

Figure S1 shows that we see the same result on class-dependent noise for 5-dimensional data as already shown in 2-dimensional data. Accuracy on data trained with class-dependent noise depends on the level of noise  $\epsilon$ , as well as the spread,  $s$ ; but it does not depend directly on the number of classes,  $c$ .

Figure S2 shows that we see similar trends on feature-dependent noise for 5-dimensional data as already shown in 2-dimensional data. Accuracy on data trained with gap-max feature-dependent noise performs worse than other types of noise at low levels,  $\epsilon$ , of noise. Interestingly, the difference between feature-dependent and class-dependent noise appears to diminish for an increased number of classes.

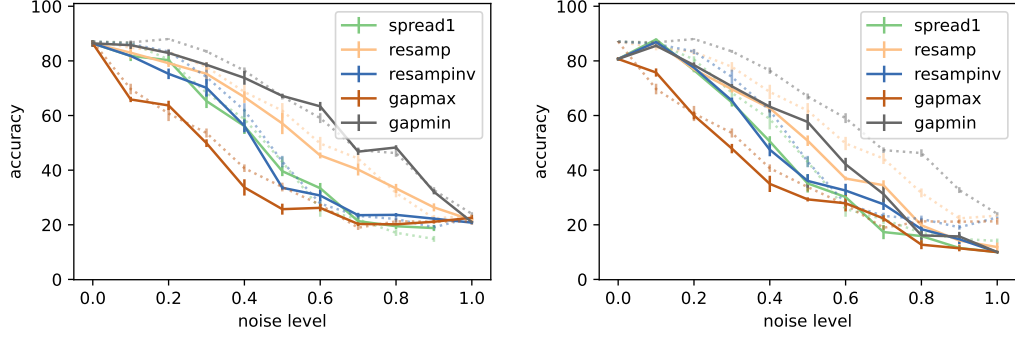

(a) CleanLab (solid) against baseline (dashed)

(b) CoTeaching(solid) against baseline (dashed)

Figure S3: Label noise mitigation methods on synthetic 2D data with 10 classes.

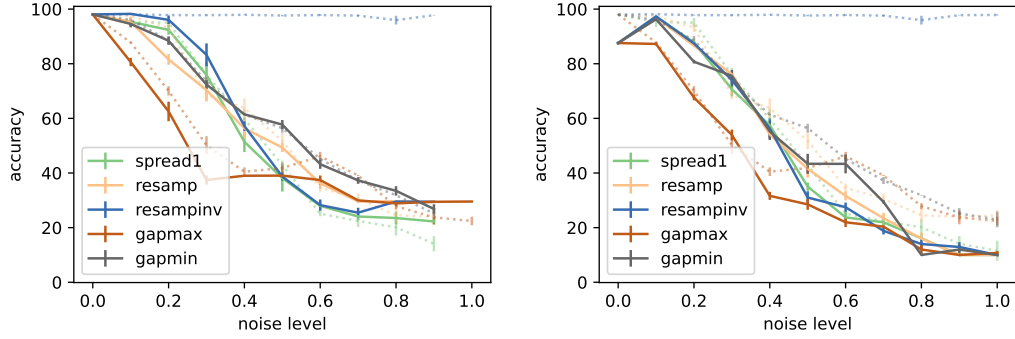

(a) CleanLab (solid) against baseline (dashed)

(b) CoTeaching(solid) against baseline (dashed)

Figure S4: Label noise mitigation methods on synthetic 5D data with 10 classes.

### B.3 Results on Mitigation Methods

Fig. S3 shows the same results as Fig. S3, but with the accuracy results of the vanilla (no label noise mitigation strategy) learning approach in dashed lines to make comparison with this baseline easier.

Fig. S4 compares the clean test accuracy on 10-class, 5-dimensional synthetic data of two label-noise mitigation methods: CleanLab [4] and CoTeaching [1] against the baseline of no mitigation of label noise. We see that broadly, CleanLab has little positive effect, and in particular may perform worse than using no mitigation strategy at low levels of feature-dependent noise; while CoTeaching performs the same or worse than baseline.

## C Further Image Benchmark Experiments

### C.1 Learning details

These experiments use publicly available code released authors of the various methods on GitHub: CleanLab [4], MixUp [7], Symmetric cross-entropy (SCE) [6], and Co-teaching [1]. Each of the methods is run with default parameters found in the corresponding repositories. The GitHub repositories and the licenses can be found at:

- CleanLab [4] repository us released under MIT license and can be found at [github.com/cgnorthcutt/confidentlearning-reproduce](https://github.com/cgnorthcutt/confidentlearning-reproduce)
- MixUp [7] repository us released under MIT and CC-BY-NC licenses and can be found at [github.com/facebookresearch/mixup-cifar10](https://github.com/facebookresearch/mixup-cifar10)
- SCE [6] repository can be found at [github.com/HanxunH/SCELoss-Reproduce](https://github.com/HanxunH/SCELoss-Reproduce)

- Co-teaching [1] repository can be found at [github.com/bhanML/Co-teaching](https://github.com/bhanML/Co-teaching)

Note that SCE [6] and Co-teaching [1] repositories, and the CIFAR10[3] and CIFAR100[3] dataset do not have license attached to them. The CIFAR10[3] and CIFAR100[3] are publicly available on Alex Krizhevsky’s website<sup>1</sup>, and are a subset of the TinyImages dataset, that is no longer available<sup>2</sup>.

Our code is developed on an internal cluster, where each server node is equipped with 4 NVIDIA Tesla A100 cards (each with 40 GB of VRAM), paired with a 64-core AMD EPYC cpu and 256GB of memory. All of our experiments utilize the ResNet-32 architecture across all mitigation methods.

The total amount of compute can be summarized as follows: each experiment with a single mitigation method would on average take 3 hours. Given total of 8 mitigation methods (including 5 variations of CleanLab), 12 noise settings, 2 datasets, and 4 methods of generating noise for each datasets, this results in a total compute requirement of roughly 2304 compute hours.

## C.2 Results on CIFAR

In the following section, we include results for all of the mitigation methods tested: 5 CleanLab variations, MixUp, SCE, and Co-teaching. Each noise mitigation methods was tested on both CIFAR10[3] and CIFAR100[3]. For each dataset, the error flipping was driven by either VisHash or ResNet-50 features, and either by the class noise or feature noise.

Table S1: CIFAR10 clean accuracy with error flipping driven by VisHash features.

| Class noise          | $\epsilon = 0.2$ |              |              | $\epsilon = 0.4$ |              |              | $\epsilon = 0.6$ |              |              | $\epsilon = 0.8$ |              |              |
|----------------------|------------------|--------------|--------------|------------------|--------------|--------------|------------------|--------------|--------------|------------------|--------------|--------------|
|                      | $s = 1$          | $s = 2$      | $s = 5$      | $s = 1$          | $s = 2$      | $s = 5$      | $s = 1$          | $s = 2$      | $s = 5$      | $s = 1$          | $s = 2$      | $s = 5$      |
| Baseline             | 78.15            | 80.01        | 80.80        | 58.94            | 63.49        | 66.88        | 35.26            | 40.62        | 48.70        | <b>15.07</b>     | <b>15.28</b> | 19.44        |
| CL Argmax            | 87.86            | 87.57        | 87.44        | <b>84.66</b>     | 85.48        | 85.62        | 20.81            | <b>75.08</b> | 81.95        | 4.78             | 8.46         | <b>51.48</b> |
| CL Both              | 88.74            | 88.55        | 88.34        | 84.23            | <b>86.66</b> | 86.47        | 20.59            | 69.14        | 81.71        | 4.79             | 8.41         | 34.33        |
| CL PBC               | 88.20            | 87.93        | 88.17        | 84.62            | 85.89        | 85.79        | 20.59            | 73.99        | <b>82.22</b> | 5.09             | 8.07         | 47.41        |
| CL PBNR              | 88.33            | 88.53        | 88.41        | 84.65            | 86.45        | 86.58        | 20.78            | 69.00        | 81.91        | 4.91             | 8.33         | 34.41        |
| CleanLab             | 88.41            | 88.89        | 88.87        | 83.39            | 86.27        | <b>86.66</b> | 21.74            | 73.06        | 81.73        | 4.51             | 7.96         | 50.69        |
| MixUp                | <b>90.62</b>     | <b>90.45</b> | <b>90.69</b> | 77.77            | 86.33        | 85.01        | 12.27            | 64.29        | 76.02        | 5.16             | 4.59         | 28.16        |
| SCE                  | 86.21            | 86.62        | 87.38        | 57.42            | 82.71        | 84.23        | 15.53            | 42.86        | 63.47        | 10.68            | 6.26         | 15.90        |
| Co-Teaching          | 87.23            | 88.12        | 88.09        | 67.79            | 71.31        | 71.21        | <b>22.80</b>     | 43.33        | 50.17        | 6.19             | 8.91         | 22.22        |
| <b>Feature noise</b> |                  |              |              |                  |              |              |                  |              |              |                  |              |              |
| Baseline             | 76.92            | 77.43        | 78.73        | 59.86            | 60.84        | 63.72        | 35.89            | 39.49        | 40.70        | 16.81            | 16.87        | 17.55        |
| CL Argmax            | 86.96            | 86.75        | 87.09        | <b>82.50</b>     | 83.71        | 84.69        | 31.44            | 56.33        | 76.64        | <b>22.86</b>     | <b>23.29</b> | <b>27.71</b> |
| CL Both              | 87.97            | 88.24        | 88.18        | 81.44            | <b>84.78</b> | 85.95        | 32.89            | 50.96        | 70.67        | 21.93            | 20.95        | 21.36        |
| CL PBC               | 87.95            | 88.02        | 87.96        | 81.55            | 84.11        | 84.65        | 32.59            | 54.12        | <b>76.74</b> | 22.18            | 22.63        | 26.12        |
| CL PBNR              | 87.75            | 87.76        | 87.75        | 81.30            | 84.67        | 86.01        | 32.06            | 51.66        | 70.43        | 21.88            | 21.58        | 22.06        |
| CL Conf Joint        | 88.56            | 88.47        | 88.55        | 82.47            | 84.30        | <b>86.03</b> | 32.06            | <b>56.90</b> | 76.04        | 22.10            | 22.58        | 26.37        |
| MixUp                | <b>88.70</b>     | <b>89.85</b> | <b>89.83</b> | 76.14            | 78.30        | 82.48        | <b>41.75</b>     | 53.59        | 60.15        | 10.96            | 13.08        | 25.43        |
| SCE                  | 87.26            | 87.65        | 87.39        | 74.71            | 77.70        | 83.68        | 23.97            | 33.65        | 66.98        | 18.81            | 17.03        | 15.52        |
| Co-Teaching          | 87.15            | 87.24        | 88.01        | 64.04            | 67.77        | 70.50        | 28.76            | 35.09        | 46.70        | 12.41            | 14.23        | 17.68        |

<sup>1</sup><https://www.cs.toronto.edu/~kriz/cifar.html>

<sup>2</sup>Please see <http://groups.csail.mit.edu/vision/TinyImages/>

Table S2: CIFAR10 clean accuracy with error flipping driven by ResNet50 features.

| Class noise          | $\epsilon = 0.2$ |              |              | $\epsilon = 0.4$ |              |              | $\epsilon = 0.6$ |              |              | $\epsilon = 0.8$ |              |              |
|----------------------|------------------|--------------|--------------|------------------|--------------|--------------|------------------|--------------|--------------|------------------|--------------|--------------|
|                      | $s = 1$          | $s = 2$      | $s = 5$      | $s = 1$          | $s = 2$      | $s = 5$      | $s = 1$          | $s = 2$      | $s = 5$      | $s = 1$          | $s = 2$      | $s = 5$      |
| CL Argmax            | 87.68            | 87.72        | 87.15        | 84.08            | 85.68        | 85.18        | <b>28.11</b>     | <b>76.19</b> | 81.24        | 4.93             | <b>16.44</b> | 41.60        |
| CL Both              | 88.51            | 88.36        | 88.42        | 83.45            | 86.19        | 86.44        | 27.08            | 70.65        | 79.86        | 4.47             | 13.76        | 27.20        |
| CL PBC               | 88.37            | 88.01        | 88.29        | <b>84.44</b>     | 86.04        | 85.72        | 26.51            | 74.12        | <b>81.50</b> | 4.65             | 15.02        | 40.64        |
| CL PBNR              | 88.06            | 88.04        | 88.40        | 83.45            | 86.33        | 86.44        | 27.29            | 70.31        | 79.75        | 4.47             | 14.66        | 26.84        |
| CL Conf Joint        | 88.35            | 89.10        | 88.67        | 82.78            | <b>86.50</b> | <b>86.45</b> | 25.54            | 74.18        | 81.09        | 4.38             | 13.86        | <b>42.06</b> |
| MixUp                | <b>90.39</b>     | <b>90.99</b> | <b>90.47</b> | 77.38            | 84.51        | 84.30        | 11.63            | 64.97        | 66.61        | 4.91             | 5.95         | 30.39        |
| SCE                  | 86.36            | 87.29        | 87.43        | 50.76            | 82.77        | 84.20        | 12.83            | 35.97        | 61.02        | <b>10.33</b>     | 5.94         | 11.72        |
| Co-Teaching          | 87.07            | 87.61        | 88.29        | 67.15            | 70.70        | 71.70        | 22.21            | 45.73        | 48.29        | 5.50             | 6.42         | 21.21        |
| <b>Feature noise</b> |                  |              |              |                  |              |              |                  |              |              |                  |              |              |
| CL Argmax            | 87.41            | 87.24        | 87.13        | 83.57            | 84.56        | 84.97        | 38.51            | <b>66.82</b> | 78.81        | 9.90             | 10.10        | 30.75        |
| CL Both              | 88.37            | 88.56        | 88.18        | 82.73            | 85.76        | <b>86.51</b> | 42.64            | 59.91        | 73.92        | 9.05             | 10.40        | 20.89        |
| CL PBC               | 88.02            | 87.90        | 88.07        | <b>84.13</b>     | 85.27        | 85.24        | <b>44.50</b>     | 65.34        | 78.61        | 9.49             | 9.71         | 29.25        |
| CL PBNR              | 88.25            | 87.96        | 88.09        | 83.27            | <b>85.87</b> | 85.96        | 41.94            | 60.20        | 74.43        | 8.85             | 10.45        | 21.25        |
| CL Conf Joint        | 88.63            | 88.89        | 88.69        | 83.03            | 85.72        | 86.29        | 41.58            | 66.40        | <b>78.86</b> | 9.01             | 10.07        | <b>30.88</b> |
| MixUp                | <b>88.91</b>     | <b>90.17</b> | <b>89.99</b> | 74.61            | 80.04        | 82.40        | 36.87            | 59.57        | 66.65        | 11.31            | 12.36        | 27.38        |
| SCE                  | 86.64            | 87.48        | 87.52        | 63.50            | 76.46        | 83.95        | 16.85            | 21.37        | 62.90        | <b>16.00</b>     | <b>14.61</b> | 15.29        |
| Co-Teaching          | 86.52            | 87.33        | 88.25        | 65.21            | 66.49        | 69.98        | 27.37            | 34.99        | 47.09        | 9.74             | 9.48         | 16.82        |

Table S3: CIFAR100 clean accuracy with error flipping driven by VisHash features.

| Class noise          | $\epsilon = 0.2$ |              |              | $\epsilon = 0.4$ |              |              | $\epsilon = 0.6$ |              |              | $\epsilon = 0.8$ |              |              |
|----------------------|------------------|--------------|--------------|------------------|--------------|--------------|------------------|--------------|--------------|------------------|--------------|--------------|
|                      | $s = 1$          | $s = 2$      | $s = 5$      | $s = 1$          | $s = 2$      | $s = 5$      | $s = 1$          | $s = 2$      | $s = 5$      | $s = 1$          | $s = 2$      | $s = 5$      |
| Baseline             | 57.44            | 57.20        | 57.51        | 42.24            | 45.49        | 47.81        | <b>24.32</b>     | 29.43        | 34.17        | <b>10.37</b>     | <b>10.63</b> | 15.24        |
| CL Argmax            | 51.72            | 50.24        | 50.67        | 33.52            | 42.70        | 44.35        | 9.09             | 18.22        | 31.43        | 3.64             | 4.21         | 7.73         |
| CL Both              | 53.39            | 53.92        | 54.40        | 34.28            | 42.89        | 47.55        | 9.55             | 18.53        | 30.21        | 3.56             | 4.37         | 7.31         |
| CL PBC               | 52.94            | 52.22        | 52.49        | 34.29            | 43.52        | 45.69        | 9.29             | 18.14        | 32.52        | 3.52             | 4.39         | 7.71         |
| CL PBNR              | 53.30            | 53.26        | 53.85        | 35.13            | 42.13        | 47.53        | 8.84             | 18.94        | 29.57        | 3.75             | 4.49         | 6.74         |
| CL Conf Joint        | 51.27            | 52.79        | 53.59        | 32.84            | 40.95        | 45.06        | 9.11             | 16.36        | 30.30        | 3.83             | 4.10         | 6.60         |
| MixUp                | <b>64.79</b>     | <b>65.18</b> | <b>65.68</b> | <b>50.65</b>     | <b>57.35</b> | <b>58.27</b> | 18.64            | <b>34.07</b> | <b>48.23</b> | 5.00             | 7.58         | <b>17.93</b> |
| SCE                  | 54.88            | 56.18        | 54.93        | 33.72            | 46.87        | 50.54        | 12.59            | 19.96        | 36.70        | 6.26             | 8.72         | 12.16        |
| Co-Teaching          | 55.85            | 58.66        | 59.65        | 37.79            | 41.83        | 45.29        | 21.11            | 24.43        | 28.00        | 6.72             | 9.28         | 11.57        |
| <b>Feature noise</b> |                  |              |              |                  |              |              |                  |              |              |                  |              |              |
| Baseline             | 53.80            | 54.13        | 54.64        | 37.17            | 38.73        | 39.34        | 20.38            | 21.00        | 22.71        | 7.94             | 8.38         | 8.72         |
| CL Argmax            | 48.82            | 49.43        | 49.33        | 32.94            | 37.00        | 39.70        | 10.93            | 15.17        | 21.39        | 6.47             | 6.70         | 7.52         |
| CL Both              | 52.79            | 53.83        | 54.41        | 36.27            | 37.42        | 42.58        | 13.30            | 15.25        | 19.86        | 6.49             | 6.72         | 7.20         |
| CL PBC               | 50.78            | 51.13        | 52.03        | 34.57            | 38.14        | 41.50        | 11.56            | 15.64        | 22.12        | 6.69             | 6.67         | 7.23         |
| CL PBNR              | 52.16            | 51.88        | 53.47        | 34.02            | 37.30        | 41.06        | 12.75            | 15.54        | 19.50        | 6.52             | 6.79         | 7.44         |
| CL Conf Joint        | 51.74            | 52.75        | 53.53        | 33.42            | 36.36        | 40.58        | 11.91            | 14.64        | 22.56        | 6.56             | 6.86         | 8.04         |
| MixUp                | <b>63.10</b>     | <b>62.67</b> | <b>63.42</b> | <b>47.73</b>     | <b>50.34</b> | <b>51.87</b> | <b>27.06</b>     | <b>29.86</b> | <b>33.76</b> | <b>9.16</b>      | <b>10.55</b> | <b>13.28</b> |
| SCE                  | 53.43            | 54.02        | 55.51        | 32.43            | 36.66        | 42.39        | 9.42             | 11.70        | 17.61        | 7.29             | 7.41         | 7.76         |
| Co-Teaching          | 58.40            | 58.16        | 59.28        | 35.71            | 38.93        | 40.80        | 14.12            | 14.40        | 17.05        | 6.17             | 6.28         | 6.08         |

Table S4: CIFAR100 clean accuracy with error flipping driven by ResNet50 features.

| Class noise          | $\epsilon = 0.2$ |              |              | $\epsilon = 0.4$ |              |              | $\epsilon = 0.6$ |              |              | $\epsilon = 0.8$ |              |              |
|----------------------|------------------|--------------|--------------|------------------|--------------|--------------|------------------|--------------|--------------|------------------|--------------|--------------|
|                      | $s = 1$          | $s = 2$      | $s = 5$      | $s = 1$          | $s = 2$      | $s = 5$      | $s = 1$          | $s = 2$      | $s = 5$      | $s = 1$          | $s = 2$      | $s = 5$      |
| CL Argmax            | 50.63            | 51.47        | 50.41        | 35.45            | 43.88        | 45.38        | 8.50             | 19.19        | 34.05        | 3.37             | 4.47         | 8.36         |
| CL Both              | 53.35            | 54.13        | 54.89        | 35.37            | 44.82        | 48.39        | 9.31             | 19.86        | 31.72        | 3.40             | 5.34         | 8.01         |
| CL PBC               | 51.72            | 53.04        | 52.44        | 35.36            | 45.70        | 47.00        | 9.27             | 20.04        | 34.62        | 3.30             | 4.80         | 9.22         |
| CL PBNR              | 52.82            | 53.78        | 54.56        | 36.25            | 44.57        | 47.47        | 9.68             | 19.54        | 31.41        | 3.58             | 5.07         | 8.20         |
| CL Conf Joint        | 52.07            | 53.71        | 53.94        | 34.32            | 43.17        | 45.61        | 8.76             | 19.22        | 32.15        | 3.27             | 4.49         | 7.59         |
| MixUp                | <b>65.00</b>     | <b>66.30</b> | <b>64.75</b> | <b>50.48</b>     | <b>59.76</b> | <b>61.61</b> | 18.57            | <b>35.89</b> | <b>51.91</b> | 4.70             | 6.93         | <b>19.68</b> |
| SCE                  | 55.78            | 55.59        | 56.32        | 36.72            | 48.75        | 51.55        | 15.41            | 27.14        | 39.32        | 5.92             | <b>10.27</b> | 12.84        |
| Co-Teaching          | 56.33            | 58.50        | 59.34        | 38.87            | 42.51        | 44.33        | <b>20.98</b>     | 25.24        | 29.29        | <b>6.79</b>      | 9.63         | 12.64        |
| <b>Feature noise</b> |                  |              |              |                  |              |              |                  |              |              |                  |              |              |
| CL Argmax            | 47.14            | 48.46        | 48.65        | 27.19            | 30.85        | 39.33        | 7.92             | 11.61        | 18.08        | 2.55             | 3.26         | 4.05         |
| CL Both              | 49.97            | 51.57        | 52.49        | 28.46            | 31.46        | 39.47        | 8.69             | 11.88        | 17.09        | 3.48             | 3.67         | 3.98         |
| CL PBC               | 49.34            | 50.87        | 50.67        | 27.96            | 33.26        | 40.22        | 8.42             | 12.76        | 19.33        | 2.64             | 3.14         | 3.95         |
| CL PBNR              | 48.93            | 50.93        | 51.75        | 28.67            | 31.51        | 39.49        | 8.46             | 11.83        | 16.54        | 3.17             | 3.72         | 3.72         |
| CL Conf Joint        | 48.33            | 49.60        | 51.28        | 26.35            | 30.10        | 38.51        | 8.59             | 11.82        | 18.61        | 2.70             | 3.64         | 4.09         |
| MixUp                | <b>61.20</b>     | <b>62.00</b> | <b>63.56</b> | <b>46.47</b>     | <b>50.63</b> | <b>53.01</b> | <b>25.01</b>     | <b>29.42</b> | <b>36.18</b> | <b>6.62</b>      | <b>7.03</b>  | <b>11.67</b> |
| SCE                  | 52.31            | 54.30        | 54.41        | 34.20            | 38.41        | 44.19        | 9.16             | 12.75        | 19.25        | 3.82             | 4.57         | 4.81         |
| Co-Teaching          | 56.19            | 57.35        | 58.60        | 35.14            | 37.78        | 41.26        | 13.89            | 14.43        | 16.77        | 4.91             | 4.54         | 5.09         |

## References

- [1] Bo Han, Quanming Yao, Xingrui Yu, Gang Niu, Miao Xu, Weihua Hu, Ivor Tsang, and Masashi Sugiyama. Co-teaching: Robust training of deep neural networks with extremely noisy labels. In *Neural Information Processing Systems*, 2018.
- [2] Diederik P Kingma and Jimmy Ba. Adam: A method for stochastic optimization. In *International Conference on Learning Representations*, 2014.
- [3] Alex Krizhevsky, Geoffrey Hinton, et al. Learning multiple layers of features from tiny images. 2009.
- [4] Curtis Northcutt, Lu Jiang, and Isaac Chuang. Confident learning: Estimating uncertainty in dataset labels. *Journal of Artificial Intelligence Research*, 70:1373–1411, 2021.
- [5] Adam Paszke, Sam Gross, Francisco Massa, Adam Lerer, James Bradbury, Gregory Chanan, Trevor Killeen, Zeming Lin, Natalia Gimelshein, Luca Antiga, Alban Desmaison, Andreas Kopf, Edward Yang, Zachary DeVito, Martin Raison, Alykhan Tejani, Sasank Chilamkurthy, Benoit Steiner, Lu Fang, Junjie Bai, and Soumith Chintala. Pytorch: An imperative style, high-performance deep learning library. In *Advances in Neural Information Processing Systems*, 2019.
- [6] Yisen Wang, Xingjun Ma, Zaiyi Chen, Yuan Luo, Jinfeng Yi, and James Bailey. Symmetric cross entropy for robust learning with noisy labels. In *Proceedings of the IEEE/CVF International Conference on Computer Vision*, pages 322–330, 2019.
- [7] Hongyi Zhang, Moustapha Cisse, Yann N Dauphin, and David Lopez-Paz. mixup: Beyond empirical risk minimization. In *International Conference on Learning Representations*, 2018.
